# Supplementary material
Source: publisher site journal article supplement (https://www.dovepress.com/article/496199)

**Supplemental Materials**

e-Table 1. Baseline characteristics comparing populations with overlapping features

|  | Total population | Non-CB & non-emphysema | Non-CB & emphysema | CB & non-emphysema | CB & emphysema | PRISm | p-values |
| --- | --- | --- | --- | --- | --- | --- | --- |
|  | (N=3436) | (N=1466) | (N=766) | (N=781) | (N=350) | (N=73) |  |
| Age | 68.5 ± 8.0 | 69.0 ± 7.9 | 69.1 ± 7.9 | 67.8 ± 8.1 | 67.6 ± 8.2 | 64.8 ± 9.1 | <0.001 |
| Female sex | 268 (7.8%) | 142 (9.7%) | 37 (4.8%) | 71 (9.1%) | 8 (2.3%) | 10 (13.7%) | <0.001 |
| Body mass index | 23.1 ± 3.4 | 23.5 ± 3.4 | 22.7 ± 3.4 | 23.2 ± 3.4 | 22.3 ± 3.3 | 4.2 ± 3.7 | <0.001 |
| Smoking status |  |  |  |  |  |  | <0.001 |
| Never | 316 (9.2%) | 174 (11.9%) | 26 (3.4%) | 95 (12.2%) | 6 (1.7%) | 15 (20.8%) |  |
| Ex- | 2210 (64.5%) | 975 (66.6%) | 531 (69.5%) | 444 (56.9%) | 220 (62.9%) | 40 (55.6%) |  |
| Current | 903 (26.3%) | 314 (21.5%) | 207 (27.1%) | 241 (30.9%) | 124 (35.4%) | 17 (23.6%) |  |
| Smoking pack-year | 38.2 ± 27.0 | 35.3 ± 26.0 | 42.5 ± 26.0 | 36.4 ± 27.9 | 45.8 ± 27.2 | 34.0 ± 31.4 | <0.001 |
| **Comorbidities** |  |  |  |  |  |  |  |
| Hypertension | 1298 (37.8%) | 607 (41.4%) | 255 (33.3%) | 280 (35.9%) | 119 (34.0%) | 37 (50.7%) | <0.001 |
| Diabetes | 595 (17.3%) | 267 (18.2%) | 124 (16.2%) | 123 (15.8%) | 67 (19.1%) | 14 (19.2%) | 0.444 |
| Heart disease | 1511 (44.1%) | 681 (46.5%) | 303 (39.6%) | 346 (44.4%) | 142 (40.6%) | 39 (53.4%) | 0.007 |
| GERD | 270 (7.9%) | 103 (7.0%) | 48 (6.3%) | 84 (10.8%) | 30 (8.6%) | 5 (6.8%) | 0.009 |
| Asthma | 869 (25.4%) | 353 (24.1%) | 158 (20.8%) | 254 (32.6%) | 91 (26.1%) | 13 (18.1%) | <0.001 |
| Tuberculosis | 792 (23.1%) | 349 (23.8%) | 138 (18.1%) | 205 (26.3%) | 81 (23.2%) | 19 (26.4%) | 0.003 |
| Allergic rhinitis | 271 (7.9%) | 98 (6.7%) | 43 (5.6%) | 95 (12.2%) | 27 (7.7%) | 8 (11.1%) | <0.001 |
| Atopic dermatitis | 66 (1.9%) | 24 (1.6%) | 7 (0.9%) | 28 (3.6%) | 3 (0.9%) | 4 (5.6%) | <0.001 |
| **Pulmonary function** |  |  |  |  |  |  |  |
| FEV1 (L) | 1.7 ± 0.6 | 1.7 ± 0.6 | 1.7 ± 0.6 | 1.6 ± 0.6 | 1.6 ± 0.6 | 2.0 ± 0.5 | <0.001 |
| FEV1 (%) | 57.0 ± 18.8 | 58.6 ± 18.8 | 56.4 ± 19.3 | 55.6 ± 18.7 | 53.2 ± 18.6 | 65.3 ± 9.5 | <0.001 |
| FVC (L) | 3.2 ± 0.8 | 3.2 ± 0.8 | 3.3 ± 0.8 | 3.2 ± 0.8 | 3.4 ± 0.8 | 2.7 ± 0.7 | <0.001 |
| FVC (%) | 78.8 ± 16.7 | 78.2 ± 16.5 | 80.8 ± 17.3 | 77.8 ± 16.0 | 81.9 ± 17.1 | 65.2 ± 11.3 | <0.001 |
| FEV1/FVC (%) | 51.3 ± 12.9 | 52.7 ± 12.2 | 49.0 ± 12.3 | 50.9 ± 12.9 | 46.4 ± 12.3 | 73.7 ± 8.8 | <0.001 |
| DLCO | 13.4 ± 4.8 | 13.9 ± 4.7 | 12.7 ± 4.8 | 13.9 ± 4.9 | 12.0 ± 4.4 | 14.9 ± 5.2 | <0.001 |
| DLCO (%) | 65.1 ± 21.0 | 68.3 ± 20.3 | 61.1 ± 21.2 | 66.7 ± 21.1 | 57.1 ± 19.3 | 69.2 ± 21.5 | <0.001 |
| DLCO/VA | 3.1 ± 1.0 | 3.3 ± 1.0 | 2.9 ± 0.9 | 3.2 ± 0.9 | 2.7 ± 0.9 | 3.8 ± 1.0 | <0.001 |
| DLCO/VA (%) | 76.1 ± 23.0 | 79.8 ± 22.5 | 70.6 ± 22.8 | 78.7 ± 22.0 | 65.5 ± 20.9 | 89.3 ± 23.5 | <0.001 |
| **Laboratory findings** |  |  |  |  |  |  |  |
| WBC | 7.3 ± 2.4 | 7.1 ± 2.3 | 7.3 ± 2.4 | 7.3 ± 2.4 | 7.9 ± 3.0 | 6.8 ± 2.1 | <0.001 |
| Eosinophil (%) | 3.3 ± 3.2 | 3.3 ± 3.2 | 3.1 ± 2.8 | 3.4 ± 3.6 | 3.2 ± 3.0 | 3.7 ± 3.8 | 0.232 |
| Hb | 14.2 ± 1.5 | 14.1 ± 1.6 | 14.2 ± 1.5 | 14.2 ± 1.5 | 14.3 ± 1.6 | 14.2 ± 1.6 | 0.563 |
| ESR | 16.2 ± 16.7 | 15.0 ± 15.5 | 16.6 ± 17.6 | 17.5 ± 18.5 | 16.9 ± 15.1 | 16.4 ± 16.0 | 0.093 |
| **Quality of life** |  |  |  |  |  |  |  |
| mMRC | 1.30 ± 0.91 | 1.16 ± 0.82 | 1.28 ± 0.89 | 1.45 ± 1.00 | 1.61 ± 0.99 | 1.08 ± 0.89 | <0.001 |
| CAT | 13.9 ± 8.0 | 12.3 ± 7.1 | 12.7 ± 7.7 | 17.0 ± 8.6 | 17.4 ± 8.2 | 11.3 ± 7.2 | <0.001 |
| SGRQ symptom score | 39.4 ± 21.4 | 33.5 ± 17.9 | 33.1 ± 19.1 | 51.5 ± 21.9 | 52.1 ± 22.1 | 32.6 ± 20.0 | <0.001 |
| SGRQ activity score | 38.6 ± 26.7 | 34.4 ± 24.5 | 38.2 ± 26.7 | 43.7 ± 28.6 | 47.2 ± 27.4 | 29.8 ± 23.1 | <0.001 |
| SGRQ impacts score | 20.6 ± 21.4 | 16.0 ± 17.1 | 17.8 ± 20.0 | 28.4 ± 24.8 | 29.5 ± 25.3 | 14.3 ± 17.2 | <0.001 |
| SGRQ total score | 29.5 ± 20.7 | 24.8 ± 17.2 | 26.9 ± 20.0 | 37.1 ± 22.9 | 39.0 ± 22.8 | 22.3 ± 16.8 | <0.001 |
| 6-minute walk distance | 381.5 ± 116.2 | 380.9 ± 119.8 | 387.7 ± 115.4 | 381.6 ± 111.7 | 379.6 ± 111.8 | 340.3 ± 117.8 | 0.09 |
| BODE index | 2.3 ± 1.9 | 2.0 ± 1.8 | 2.3 ± 2.0 | 2.5 ± 1.9 | 2.8 ± 2.1 | 1.6 ± 1.5 | <0.001 |
| **Exacerbation** |  |  |  |  |  |  |  |
| Moderate | 568 (16.5%) | 226 (15.4%) | 119 (15.5%) | 151 (19.3%) | 72 (20.6%) | 0 (0.0%) | <0.001 |
| Severe | 163 (4.7%) | 61 (4.2%) | 41 (5.4%) | 36 (4.6%) | 25 (7.1%) | 0 (0.0%) | 0.043 |
| Total | 626 (18.2%) | 252 (17.2%) | 133 (17.4%) | 163 (20.9%) | 78 (22.3%) | 0 (0.0%) | <0.001 |

Abbreviations: CB, chronic bronchitis; PRISm, preserved ratio impaired spirometry; PY, pack-year; GERD, gastro-esophageal reflux disease; FEV1, forced expiratory volume in 1 second; FVC, forced vital capacity; DLCO, diffusion capacity; DLCO/VA, diffusion capacity/alveolar volume; WBC, white blood cell; BEC, blood eosinophil count; Hb, hemoglobin; ESR, erythrocyte sedimentation rate; mMRC, modified Medical Research Council; CAT, COPD assessment test; SGRQ, St. George Respiratory Questionnaire; 6MWD, 6-minute walk distance

e-Table 2. Baseline characteristics comparing populations of patients with and without history of tuberculosis

|  | PTB (-) | PTB (+) | p-value |
| --- | --- | --- | --- |
|  | (N=2634) | (N=792) |  |
| Age | 68.7 ± 8.0 | 67.8 ± 8.2 | 0.007 |
| Female sex | 186 (7.1%) | 79 (10.0%) | 0.009 |
| Body mass index | 23.3 ± 3.4 | 22.6 ± 3.4 | <0.001 |
| Smoking status |  |  | <0.001 |
| Never | 205 (7.8%) | 108 (13.6%) |  |
| Ex- | 1669 (63.5%) | 535 (67.6%) |  |
| Current | 753 (28.7%) | 149 (18.8%) |  |
| Smoking pack-year | 38.8 ± 26.3 | 36.4 ± 29.0 | 0.037 |
| **Comorbidities** |  |  |  |
| Hypertension | 983 (37.3%) | 314 (39.7%) | 0.243 |
| Diabetes | 462 (17.5%) | 131 (16.5%) | 0.547 |
| Heart disease | 1138 (43.3%) | 371 (46.9%) | 0.076 |
| GERD | 198 (7.5%) | 71 (9.0%) | 0.216 |
| Asthma | 675 (25.7%) | 192 (24.4%) | 0.491 |
| Allergic rhinitis | 216 (8.2%) | 55 (7.0%) | 0.284 |
| Atopic dermatitis | 49 (1.9%) | 17 (2.2%) | 0.706 |
| **Pulmonary function** |  |  |  |
| FEV1 (L) | 1.7 ± 0.6 | 1.6 ± 0.6 | <0.001 |
| FEV1 (%) | 58.2 ± 18.8 | 53.1 ± 18.6 | <0.001 |
| FVC (L) | 3.3 ± 0.8 | 3.1 ± 0.9 | 0.002 |
| FVC (%) | 79.4 ± 16.6 | 76.7 ± 16.8 | <0.001 |
| FEV1/FVC (%) | 51.8 ± 13.0 | 49.5 ± 12.5 | <0.001 |
| DLCO | 13.6 ± 4.8 | 12.8 ± 4.6 | <0.001 |
| DLCO (%) | 66.2 ± 21.2 | 61.5 ± 20.0 | <0.001 |
| DLCO/VA | 3.1 ± 1.0 | 3.1 ± 1.0 | 0.745 |
| DLCO/VA (%) | 76.3 ± 23.0 | 75.1 ± 23.1 | 0.25 |
| **Laboratory findings** |  |  |  |
| WBC | 7.2 ± 2.4 | 7.4 ± 2.5 | 0.175 |
| Eosinophil (%) | 3.3 ± 3.2 | 3.3 ± 3.3 | 0.863 |
| Hb | 14.2 ± 1.5 | 14.1 ± 1.6 | 0.046 |
| ESR | 15.5 ± 16.2 | 17.9 ± 17.3 | 0.007 |
| **Quality of life** |  |  |  |
| MMRC | 1.27 ± 0.90 | 1.39 ± 0.93 | 0.024 |
| CAT score | 13.8 ± 8.1 | 14.3 ± 7.9 | 0.108 |
| SGRQ symptom score | 38.9 ± 21.5 | 41.1 ± 21.2 | 0.012 |
| SGRQ activity score | 37.6 ± 26.5 | 41.5 ± 26.9 | <0.001 |
| SGRQ impacts score | 19.8 ± 21.1 | 22.9 ± 22.2 | <0.001 |
| SGRQ total score | 28.7 ± 20.4 | 31.8 ± 21.1 | <0.001 |
| 6-minute walk distance | 380.3 ± 116.8 | 384.9 ± 114.6 | 0.401 |
| BODE index | 2.2 ± 1.9 | 2.6 ± 1.9 | <0.001 |
| **Exacerbation** |  |  |  |
| Moderate | 397 (15.1%) | 168 (21.2%) | <0.001 |
| Severe | 96 (3.6%) | 64 (8.1%) | <0.001 |
| Total | 435 (16.5%) | 187 (23.6%) | <0.001 |

Abbreviations: PTB, pulmonary tuberculosis; PY, pack-year; GERD, gastro-esophageal reflux disease; FEV1, forced expiratory volume in 1 second; FVC, forced vital capacity; DLCO, diffusion capacity; DLCO/VA, diffusion capacity/alveolar volume; WBC, white blood cell; BEC, blood eosinophil count; Hb, hemoglobin; ESR, erythrocyte sedimentation rate; mMRC, modified Medical Research Council; CAT, COPD assessment test; SGRQ, St. George Respiratory Questionnaire; 6MWD, 6-minute walk distance

e-Figure 1. Wayne diagram of study population


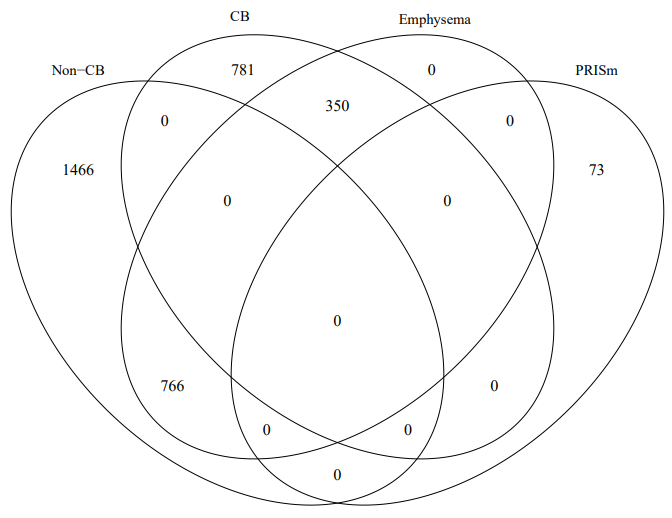


CB, chronic bronchitis; PRISm, preserved ratio impaired spirometry

e-Figure 2. Correlation network of the entire population


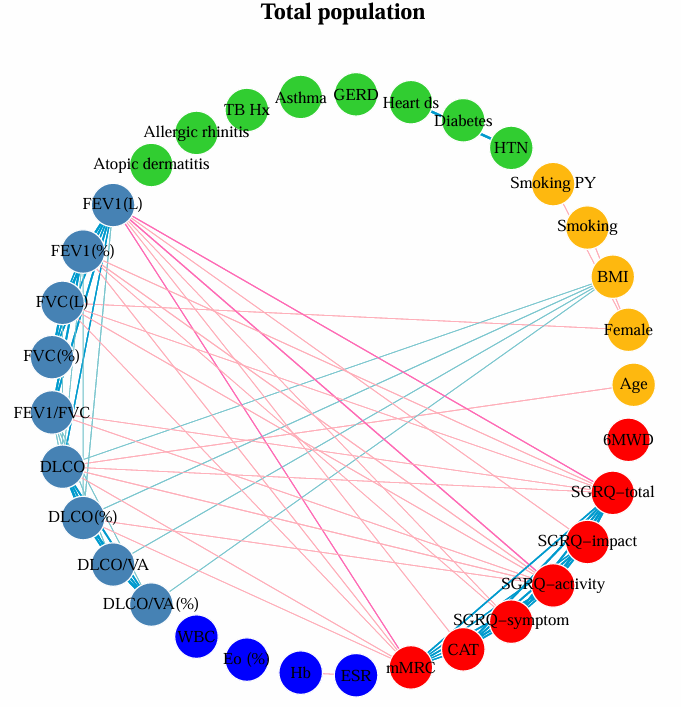


Spearman’s rank correlation was applied to generate the correlation network. Each variable was represented by a node, and links between the nodes indicated the existence of a significant association with a coefficient of >0.3. The thickness and darkness of the links represented the strength of the correlation (Spearman’s coefficient), and the color indicated the direction of the association (blue for positive and pink for negative).

e-Figure 3. Correlation matrices


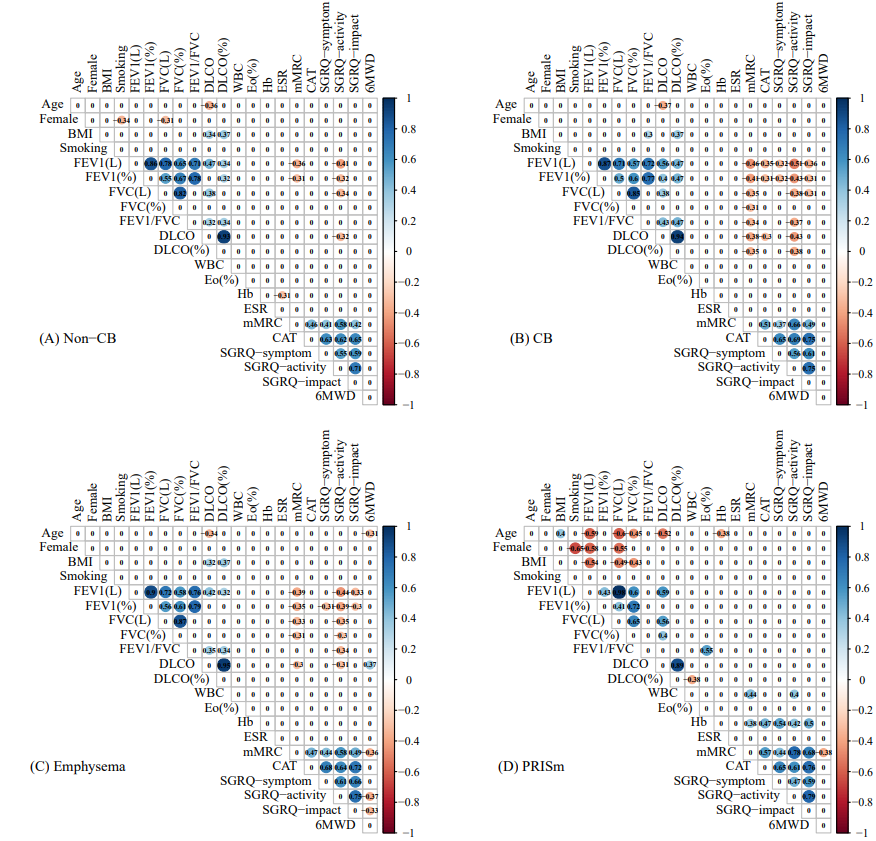


The correlation matrices of the (A) non-chronic bronchitis, (B) chronic bronchitis, (C) emphysema, and (D) preserved ratio impaired spirometry groups are presented. Only Spearman’s coefficients with significant correlations are shown.

e-Figure 4. The P-values for comparing Spearman’s correlation coefficients


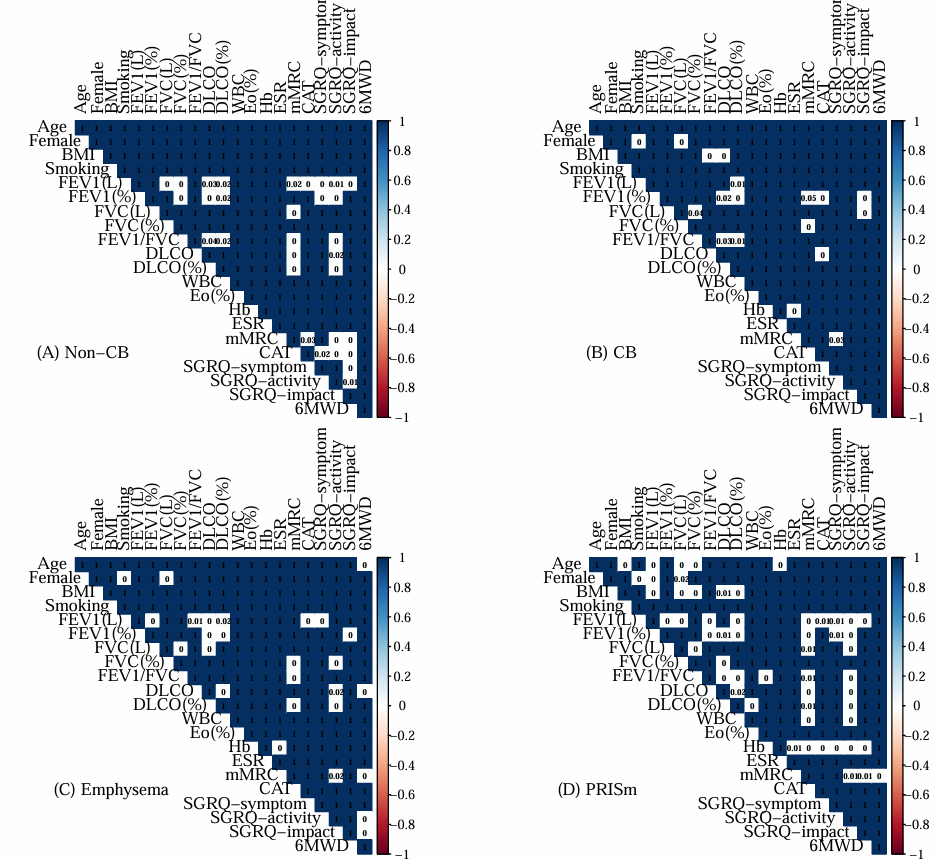


The Spearman’s correlation coefficients are compared between the (A) non-chronic bronchitis, (B) chronic bronchitis, (C) emphysema, and (D) preserved ratio-impaired spirometry groups

e-Figure 5. The least absolute shrinkage and selection operation regression analysis coefficient profiles were used to select variables for inclusion in the multivariable analysis to identify predictors of chronic obstructive pulmonary disease exacerbation in the (A) total patient population, (B) non-chronic bronchitis group, (C) chronic bronchitis group, and (D) emphysema group.


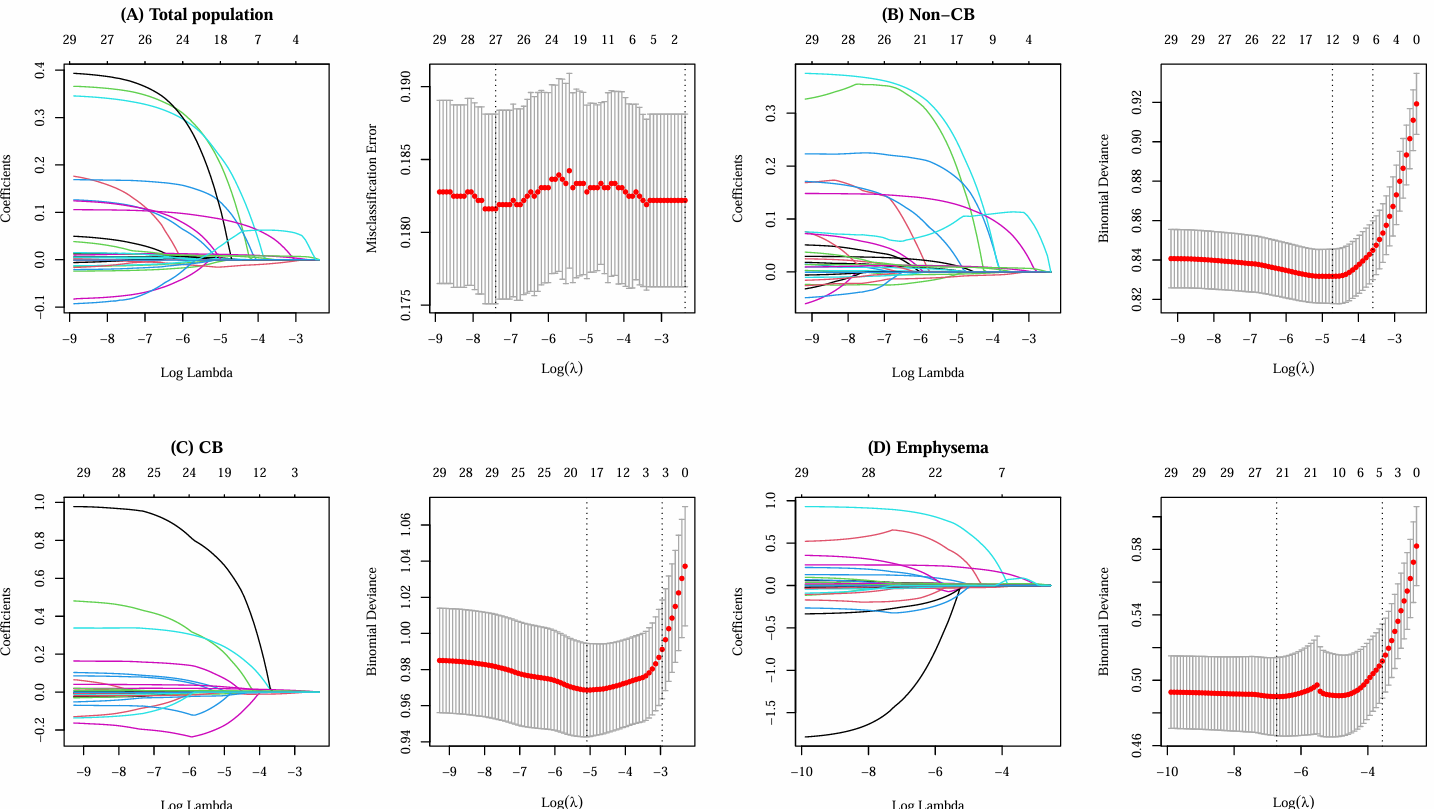

Supplement: Supplementary file 1 [file 496199-revised-supplementary-material.docx]
